# Supplementary material for: Antimicrobial Activity of Bee Venom and Melittin against Borrelia burgdorferi
Source: Antibiotics (Basel). 2017 Nov 29;6(4):31. doi: 10.3390/antibiotics6040031 (PMC5745474; doi:10.3390/antibiotics6040031)
Supplement: Supplementary file 1 [file antibiotics-06-00031-s001.pdf]

## Article

# Antimicrobial Activity of Bee Venom and Melittin against *Borrelia burgdorferi*

Kayla M. Socarras, Priyanka A. S. Theophilus, Jason P. Torres, Khusali Gupta and Eva Sapi \*

## Supplementary Materials

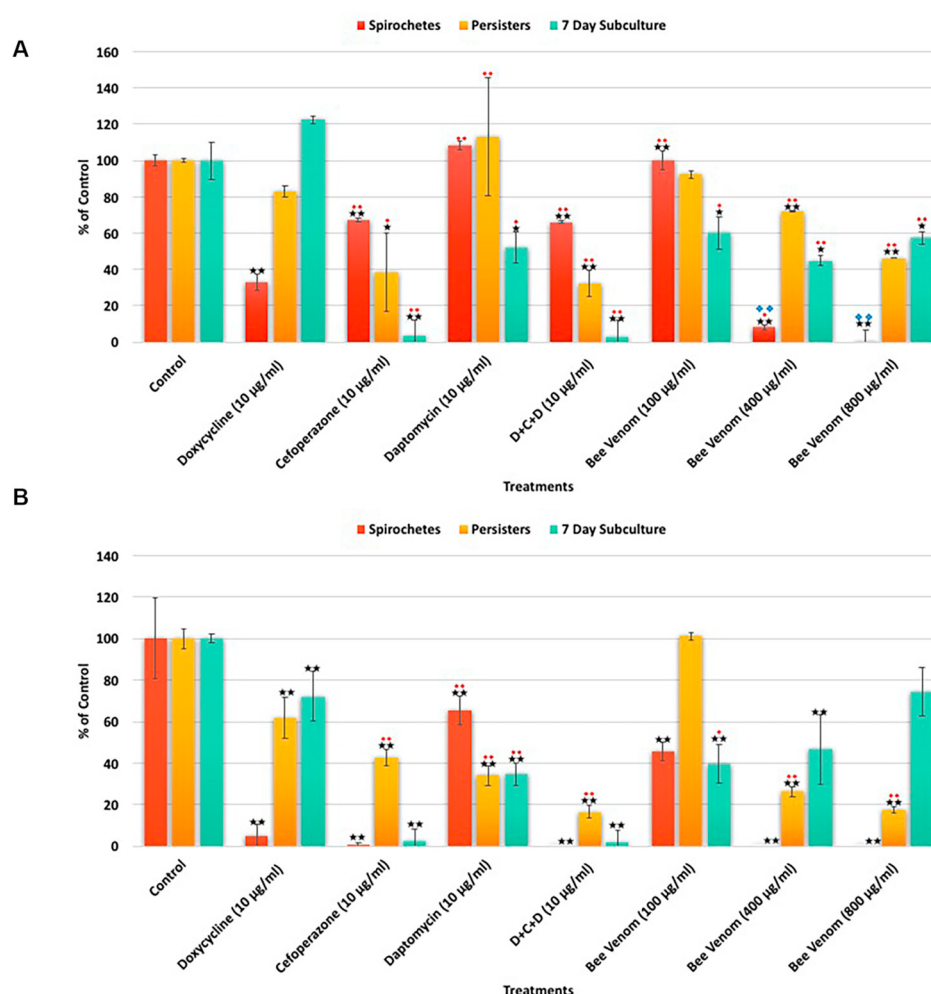

**Figure S1.** The single dose effects of various antimicrobial agents on *B. burgdorferi* for as determined by SYBR Green I/PI assay (Panel A) or direct counting assay (Panel B). Doxycycline, Cefoperazone, Daptomycin, and their combination (D+C+D) as well as different concentration of bee venom and melittin were tested on *B. burgdorferi* logarithmic phase (spirochetes) culture and stationary phase (persisters) cultures as well as in 7-day recovery subculture as described previously. Significance against PBS buffer (control vehicle) with the p value of < 0.05 and < 0.01 are indicated in ★ and ★★ respectively. Significance against Doxycycline with the p value of < 0.05 and < 0.01 are respectively indicated in ♦ and ♦♦. Significance against the three-antibiotic combination D+C+D with the p-value of < 0.05 and < 0.01 are indicated in ◆ and ◆◆ respectively. N=9

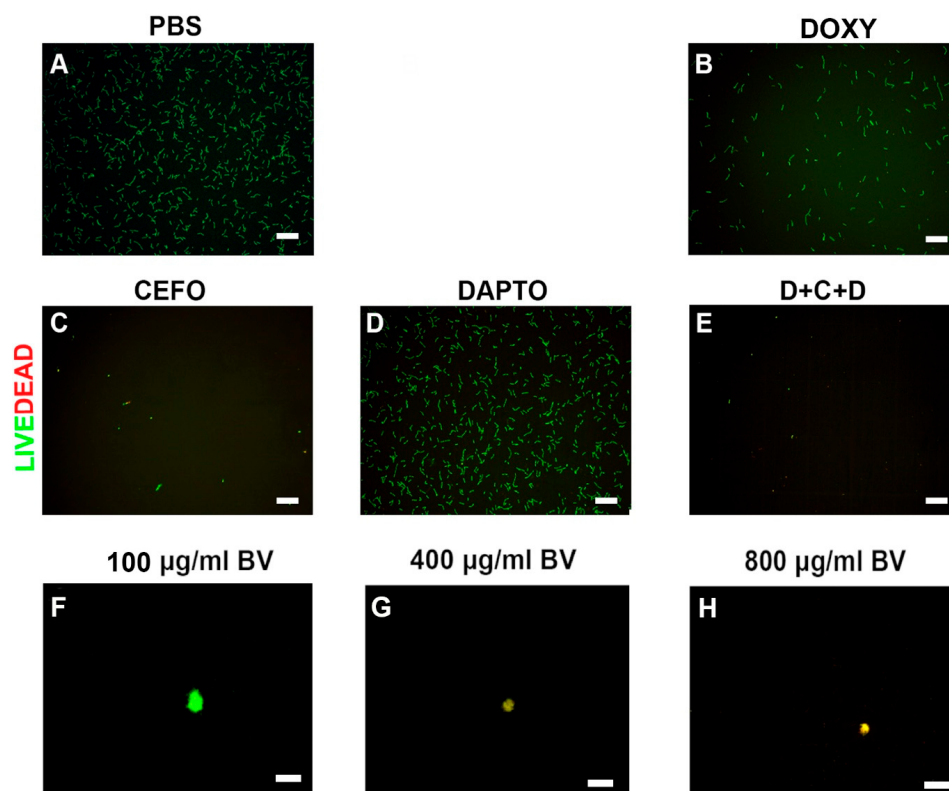

**Figure S2.** Representative Live/Dead staining images of *B. burgdorferi* log phase spirochetal cultures following single dose treatment with different antimicrobial agents. Cells were stained with SYBR Green I/PI as outlined in the Methods and representative images were taken at 100× magnification. (A) *Borrelia* culture treated only with PBS was used as a negative control. Panel B: Doxycycline (DOXY) treated, Panel C: Cefoperazone (CEFO) treated, Panel D: Daptomycin (DAPTO) treated and Panel E: Three-antibiotic combination (D+C+D) treated. Panels F-H: Bee venom (BV) was used in increasing concentrations. Live cells are stained with green color while dead cells are stained red. Scale bar:100 µm.

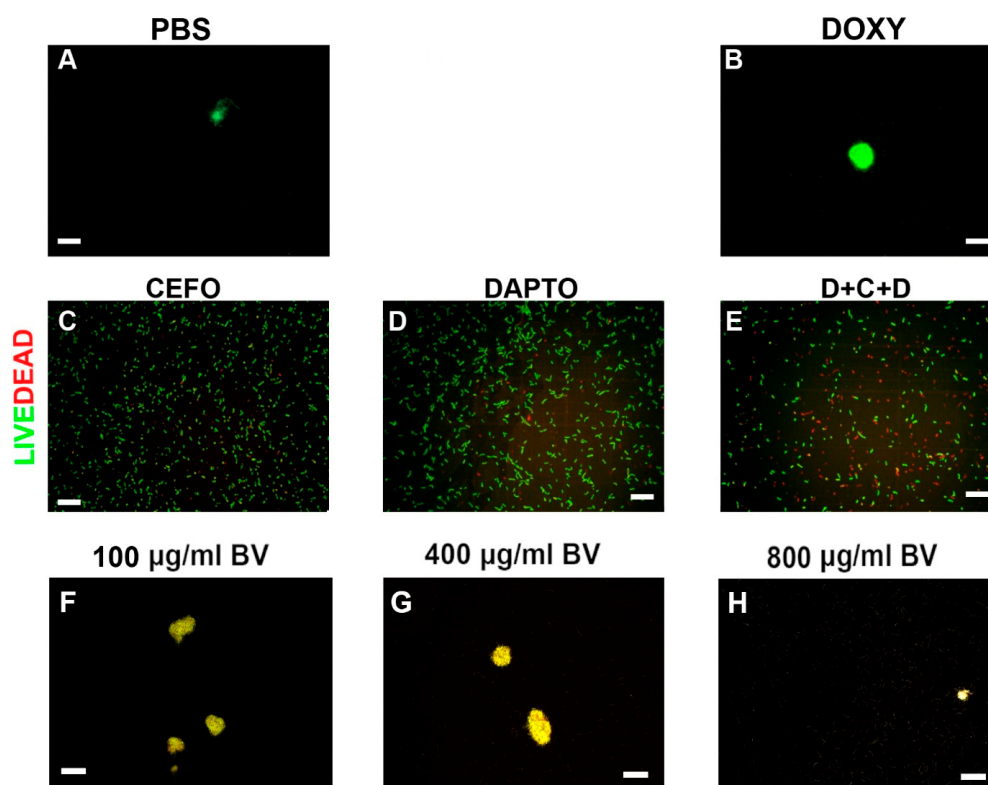

**Figure S3.** Representative Live/Dead staining images of *B. burgdorferi* stationary phase persister cultures following single dose treatment with different antimicrobial agents. Cells were stained with SYBR Green I/PI as outlined in the Methods and representative images were taken at 100× magnification. (A) *Borrelia* culture treated only with PBS was used as a negative control. Panel B: Doxycycline (DOXY) treated, Panel C: Cefoperazone (CEFO) treated, Panel D: Daptomycin (DAPTO) treated and Panel E: Three-antibiotic combination (D+C+D) treatment. Panels F-H: Bee venom (BV) was used in increasing concentrations. Live cells are stained with green color while dead cells are stained red. Scale bar: 100 µm.

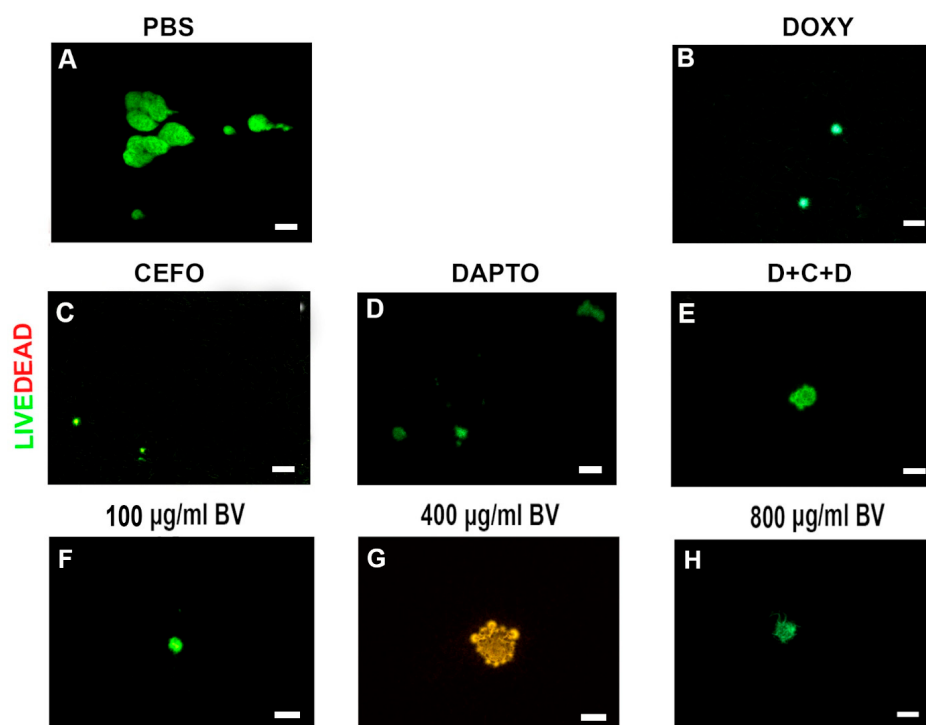

**Figure S4.** Representative Live/Dead staining images of *B. burgdorferi* 7-day recovery cultures following single treatment with different antimicrobial agents. Cells were stained with SYBR Green I/PI as outlined in the Material and Methods and representative images were taken at 100× magnification. (A) *Borrelia* culture treated only with PBS was used as a negative control. Panel B: Doxycycline (DOXY) treated, Panel C: Cefoperazone (CEFO) treated, Panel D: Daptomycin (DAPTO) treated and Panel E: Three-antibiotic combination (D+C+D) treatment. Panels F-H: Bee venom (BV) was used in increasing concentrations. Live cells are stained with green color while dead cells are stained red. Scale bar: 100 µm.

**Table S1.** The single dose effects of various antimicrobial agents on *B. burgdorferi* as determined by SYBR Green I/PI assay (Panel A) or direct counting assay (Panel B). Doxycycline, Cefoperazone, Daptomycin, and their combination (D+C+D) as well as different concentrations of bee venom and melittin were tested on *B. burgdorferi* logarithmic phase (spirochetes) culture and stationary phase (persisters) cultures as well as in 7-day recovery subculture as described previously [6, 7, 8, 26]. N=9

| A. SYBR Green I / PI assay |             |      |          |            |      |          |                  |      |          |
|----------------------------|-------------|------|----------|------------|------|----------|------------------|------|----------|
| Treatments                 | Spirochetes |      |          | Persisters |      |          | 7 Day Subculture |      |          |
|                            | % Control   | % SD | % Median | % Control  | % SD | % Median | % Control        | % SD | % Median |
| Control                    | 100         | 11   | 100      | 100        | 12   | 100      | 100              | 16   | 100      |
| Doxycycline (10 µg/ml)     | 33          | 4    | 33       | 83         | 3    | 86       | 122              | 2    | 83       |
| Cefoperazone (10 µg/ml)    | 67          | 1    | 66       | 38         | 22   | 41       | 4                | 9    | 3        |
| Daptomycin (10 µg/ml)      | 108         | 2    | 107      | 113        | 32   | 120      | 52               | 8    | 43       |
| D+C+D (10 µg/ml)           | 66          | 1    | 65       | 32         | 7    | 34       | 3                | 9    | 2        |
| Bee venom (100 µg/ml)      | 60.6        | 11.2 | 62       | 96         | 7    | 98       | 88               | 29   | 103      |
| Bee venom (400 µg/ml)      | 44.9        | 11.5 | 44       | 68         | 25   | 79       | 59               | 19   | 87       |
| Bee venom (800 µg/ml)      | 33.2        | 8.0  | 41       | 53         | 2    | 55       | 95               | 31   | 104      |

| B. | Direct Counting Assay   | Spirochetes |      |          | Persisters |      |          | 7 Day Subculture |      |          |
|----|-------------------------|-------------|------|----------|------------|------|----------|------------------|------|----------|
|    | Treatments              | % Control   | % SD | % Median | % Control  | % SD | % Median | % Control        | % SD | % Median |
|    | Control                 | 100         | 19   | 100      | 100        | 5    | 100      | 100              | 8    | 100      |
|    | Doxycycline (10 µg/ml)  | 5           | 6    | 5        | 62         | 10   | 67       | 72               | 12   | 60       |
|    | Cefoperazone (10 µg/ml) | 1           | 1    | 0        | 43         | 4    | 43       | 2                | 6    | 2        |
|    | Daptomycin (10 µg/ml)   | 65          | 7    | 73       | 34         | 5    | 36       | 35               | 6    | 175      |
|    | D+C+D (10 µg/ml)        | 0           | 0    | 0        | 17         | 3    | 17       | 2                | 6    | 0        |
|    | Bee venom (100 µg/ml)   | 46          | 4    | 46       | 101        | 2    | 101      | 31               | 7    | 34       |
|    | Bee venom (400 µg/ml)   | 0           | 0    | 0        | 26         | 2    | 26       | 36               | 13   | 37       |
|    | Bee venom (800 µg/ml)   | 0           | 0    | 0        | 17         | 1    | 17       | 58               | 9    | 58       |

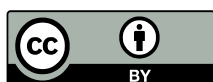

© 2017 by the authors. Submitted for possible open access publication under the terms and conditions of the Creative Commons Attribution (CC BY) license (<http://creativecommons.org/licenses/by/4.0/>).
